# Table S2

| <u>Sequence 5' -&gt; 3'</u>                                                 | <u>Purpose</u>  | <u>Probe Sets Used With</u> |
|-----------------------------------------------------------------------------|-----------------|-----------------------------|
| <b>ATTO488</b> -CCAGTGCCTCGTGTGAGAAGTC                                      | PCR Primer      | Xq28 "X1"                   |
| CTGCAGAGAAGAGGCAGGTTTC                                                      | PCR Primer      | Xq28 "X1"                   |
| <b>ATTO565</b> -CGCTCGGTCTCCGTTCTGCTC                                       | PCR Primer      | Xq28 "X2"                   |
| GGGCTAGGTACAGGGTTCAGC                                                       | PCR Primer      | Xq28 "X2"                   |
| <b>Alexa647</b> -CAGGTCGAGCCCTGTAGTACGa                                     | PCR Primer      | Xq28 "X3"                   |
| <b>ATTO488</b> -TTGATCTACATAttCAGGTCGAGCCCTGTAGTACG                         | PCR Primer      | Xq28 "X3"                   |
| CTAGGAGACAGCCTCGGACAC                                                       | PCR Primer      | Xq28 "X3"                   |
| TATGTAGATC- <b>CY3B</b>                                                     | DNA-PAINT       | Xq28 "X3"                   |
| TTATACATCTAG                                                                | DNA-PAINT       | Xist RNA                    |
| CTAGATGTAT- <b>CY3B</b>                                                     | DNA-PAINT       | Xist RNA                    |
| CCATGGCGAGAAGGTCTGCG                                                        | PCR Primer      | 19p13.2 1035 kb & 20 kb     |
| TAATACGACTCACTATAGGGGCGTGTGCGAGTGGTTGGAC                                    | PCR Primer + T7 | 19p13.2 1035 kb & 20 kb     |
| GGTGTGGGCTAGCGCCAATCGGTCTTACAGCGGCGCAATGTTTAGCGCAGGAGGTCCACGACGTGCAAGGGTGT  | Secondary Oligo | 19p13.2 1035 kb             |
| <b>Alexa647</b> -ACACCCCTTGCACGTCGTGGACCTCCTGCGCTATTTTTTTT- <b>Alexa647</b> | Tertiary Oligo  | 19p13.2 1035 kb             |
| CTCCGGCGGACTCATCCAGGGTCTTACAGCGGCGCAATGTTTACCAGCGTCGCATAGAACGGAAGAGCGTGTG   | Secondary Oligo | 19p13.2 20 kb               |
| <b>Alexa647</b> -CACACGCTCTTCCGTTCTATGCGACGTCGGTGTTTTTTTT- <b>Alexa647</b>  | Tertiary Oligo  | 19p13.2 20 kb               |
| <b>Alexa405</b> -CATTGCGCCGCTGTAAGACC                                       | Tertiary Oligo  | 19p13.2 1035 kb & 20 kb     |
